# Supplementary material for: Genetic diversity and structure of one of the most endangered freshwater fish species in Mexico: Tlaloc hildebrandi (Miller, 1950) and recognition of its evolutionarily significant units
Source: PeerJ. 2021 Aug 27;9:e11952. doi: 10.7717/peerj.11952 (PMC8404570; doi:10.7717/peerj.11952)
Supplement: Supplemental Information 1 [file peerj-09-11952-s001.xlsx]

## Sheet: T1
Subbasin	Mean	Minimum	Maximum
Amarillo	70.5	37.6	97.4
Chenalhó	62.4	45.9	84.3
Jataté	75.1	50.5	107.1
Tzaconeja	68.2	40.1	103.7

## Sheet: T2
Locality	Coordinates	River	Sub-basin	Basin	Tissue number	MIT-ND2	MIT-ATP8	MIT-ATP6	NUC-S7
Río Fogótico, puente colgante	-92.58872, 16.73347	Amarillo	Amarillo	Grijalva	ET2478	MW438870	MW438903	MW438925	MW438947
					ET2479	MW438871	MW438904	MW438926	MW438948
					ET2480	MW438872	NO	NO	MW438949
					ET2481	MW438873	MW438905	MW438927	MW438950
					ET2482	MW438874	MW438906	MW438928	MW438951
Río Fogótico, el encuentro	-92.59730, 16.73363	Amarillo	Amarillo	Grijalva	ET2485	MW438875	MW438907	MW438929	MW438952
					ET2486	MW438876	MW438908	MW438930	MW438953
Parque los Humedales	-92.61505, 16.70922	Amarillo	Amarillo	Grijalva	ET2492	NO	NO	NO	NO
					ET2497	NO	MW438909	MW438931	NO
					ET2498	MW438877	NO	NO	MW438954
					ET2499	MW438878	MW438910	MW438932	MW438955
Ojo de Agua	-92.60238, 16.75330	Amarillo	Amarillo	Grijalva	ET2507	MW438879	MW438911	MW438933	MW438956
					ET2508	MW438880	MW438912	MW438934	MW438957
					ET2509	MW438881	MW438913	MW438935	MW438958
					ET2510	MW438882	MW438914	MW438936	MW438959
					ET2511	MW438883	NO	NO	MW438960
Río Amarillo	-92.59705, 16.74447	Amarillo	Amarillo	Grijalva	ET2520	MW438884	NO	NO	MW438961
					ET2523	MW438885	NO	NO	MW438962
San Pedro Chenalhó	-92.60366, 16.87658	Chenalhó	Chenalhó	Grijalva	ET2536	MW438886	MW438915	MW438937	MW438963
					ET2537	MW438887	NO	NO	MW438964
					ET2539	MW438888	NO	NO	MW438965
					ET2540	MW438889	NO	NO	MW438966
					ET2542	NO	MW438916	MW438938	NO
Río El Naranjal	-92.1054, 16.69522	Tzaconejá	Tzaconejá	Usumacinta	ET2592	MW438890	NO	NO	MW438967
					ET2593	MW438891	MW438917	MW438939	MW438968
					ET2596	MW438892	MW438918	MW438940	MW438969
					ET2598	MW438893	MW438919	MW438941	MW438970
					ET2600	MW438894	NO		MW438971
Balneario Tzaconeja	-92.01841, 16.68817	Tzaconejá	Tzaconejá	Usumacinta	ET2614	MW438895	NO		NO
					ET2615	MW438896	NO		MW438972
					ET2616	MW438897	NO		MW438973
					ET2617	NO	NO		MW438974
					ET2630	MW438898	NO		MW438975
Arroyo Ocosingo	-92.10071, 16.91406	Jataté	Jataté	Usumacinta	ET2640	MW438899	MW438920	MW438942	MW438976
					ET2641	MW438900	NO		MW438977
					ET2642	NO	MW438921	MW438943	MW438978
					ET2643	NO	MW438922	MW438944	NO
					ET2644	MW438901	MW438923	MW438945	NO
Arroyo Las Lajas	-92.11451, 16.95405	Jataté	Jataté	Usumacinta	ET2651	MW438902	MW438924	MW438946	NO

## Sheet: T3
	mt-nd2	mt-atp8&6	nuc-s7
Primers	MET and TRP	COIII.2 and ATP8.2	S7RPEX1F and S7RPEX3R
Sequence
Reference	Schelly et al., (2006)	Perdices et al., (2002)	Chow and Hazama, (1998)
Denaturing (step1)	94°C (2 minutes)	94°C (2 minutes)
Cycles (step 2)	35 cycles	35 cycles
Denaturing	94°C (45 seconds)	94°C (45 seconds)
Annealing	°C (1 minute)	°C (1 minute)
Extension	72°C (90 seconds)	72°C (90 seconds)
Final extension (step 3)	72°C (5 minutes)	72°C (5 minutes)

## Sheet: T4
LOCUS	PARAMETER	0.025	0.25	MODE	0.75	0.975	MEDIAN	MEAN
mt-nd2	Θ1	0	0.00087	0.00323	0.00833	0.07573	0.00777	0.01822
mt-nd2	Θ2	0.0004	0.00047	0.0041	0.02647	0.03507	0.03763	0.04174
mt-nd2	M2->1	0	0	6.7	4320	17906.7	4326.7	6364.1
mt-nd2	M1->2	0	0	1206.7	6933.3	18386.7	6940	8055.2
mt-atp8&6	Θ1	0	0.00493	0.01023	0.02467	0.05273	0.0217	0.02938
mt-atp8&6	Θ2	0.0012	0.0032	0.01023	0.03027	0.0914	0.02857	0.03702
mt-atp8&6	M2->1	0	0	6.7	2493.3	5320	9646.7	9535.4
mt-atp8&6	M1->2	0	0	380	1266.7	6240	11273.3	10480.4
nuc-s7	Θ1	0	0	3e-05	0.001	0.0574	0.00103	0.00576
nuc-s7	Θ2	0	0	0.00077	0.02547	0.03787	0.0427	0.04259
nuc-s7	M2->1	1840	5546.7	8806.7	14333.3	19906.7	10526.7	10563.9
nuc-s7	M1->2	1026.7	3893.3	6073.3	9266.7	17266.7	7673.3	8424.9
